# Supplementary material for: Detection of West Nile virus in a common whitethroat (Curruca communis) and Culex mosquitoes in the Netherlands, 2020
Source: PubMed Central journal article supplement (PMC7545818; doi:10.2807/1560-7917.es.2020.25.40.2001704), 2020-10-08
Supplement: 20-01704_SIKKEMA_Supplementary_Table.pdf [file 20-01704_SIKKEMA_Supplementary_Table.pdf]

### Supplementary table 1: West Nile Virus primer sequences and concentrations

This supplementary material is hosted by Eurosurveillance as supporting information alongside the article *First detection of West Nile Virus (WNV) in a Common Whitethroat (Curruca communis) and Culex mosquitoes in the Netherlands*, on behalf of the authors, who remain responsible for the accuracy and appropriateness of the content. The same standards for ethics, copyright, attributions and permissions as for the article apply. Supplements are not edited by Eurosurveillance and the journal is not responsible for the maintenance of any links or email addresses provided therein

| Mix 1            |                             | µl | Mix 2            |                          | µl |
|------------------|-----------------------------|----|------------------|--------------------------|----|
| WNVUS1_1_LEFT    | GCCTGTGTGARCTGACAACTTAG     | 10 | WNVUS1_2_RIGHT_2 | CGGGCTGTCAATATGCTAAAACGC | 10 |
| WNVUS1_1_RIGHT   | CTTTTCTTTTGTGGCTCCG         | 10 | WNVUS1_2_RIGHT   | GTGCACCAGCAGTCAATGTCTTC  | 10 |
| WNVUS1_3_LEFT    | AGTTACCCTCTCTAACTTCCAAG     | 10 | WNVUS1_2_LEFT    | GTGCACCAACAGTCGATGTCTTC  | 10 |
| WNVUS1_3_LEFT_2  | GTGACCCTCTCCAACTTCCAGG      | 10 | WNVUS1_4_LEFT    | GGATGCTAGGAAGCAACACAATGC | 10 |
| WNVUS1_3_RIGHT   | CARGAAGTCTCTGTRCTCATTCC     | 10 | WNVUS1_4_RIGHT_2 | GATGCTTGGRAGCAACACCATG   | 10 |
| WNVUS1_5_LEFT_2  | GTGTCCAACCATGGGTGAAGCC      | 10 | WNVUS1_4_RIGHT   | TGCTYCCCTTTCCAAACAGTCC   | 10 |
| WNVUS1_5_LEFT    | GCCCACCATGGGAGAAGCT         | 10 | WNVUS1_4_LEFT_2  | GCTTCCTTTGCCAAATAGTCCGC  | 10 |
| WNVUS1_5_RIGHT_2 | GTGGCATGAGGTTCTTCAAACCTCC   | 10 | WNVUS1_6_LEFT    | GACTGTGARCCACGGTCAGG     | 10 |
| WNVUS1_5_RIGHT   | GGCGTGTGGTTCCTCAAACCTCC     | 10 | WNVUS1_6_RIGHT_2 | CCGGTGTATTGCAGTTCCAACAAC | 10 |
| WNVUS1_7_LEFT_2  | TCTGAAGTGTAGGGTGAAGATGGAG   | 10 | WNVUS1_6_RIGHT   | GCAATCCAACACCACAGTGCC    | 10 |
| WNVUS1_7_LEFT    | GTCATTTGAAGTGTAGAGTGAAGATGG | 10 | WNVUS1_8_LEFT_2  | GTGAATCCATTTGTGTCTGTGGCC | 10 |
| WNVUS1_7_RIGHT   | GAGGTGAAMACCCCTCCAACCTG     | 10 | WNVUS1_8_LEFT    | GTCAACCCCTTTGTTTCAGTGCC  | 10 |
| WNVUS1_9_LEFT    | GTGGATGGGMATCAATGCYCGT      | 10 | WNVUS1_8_RIGHT_2 | GATCCATCCAGGCTTCCACATC   | 10 |
| WNVUS1_9_RIGHT_2 | CTCTTGCCCAAGCCTTCCAAC       | 10 | WNVUS1_8_RIGHT   | GGTCCATCCAAGCCTTCCACATC  | 10 |
| WNVUS1_9_RIGHT   | CTTTCCCAGGCCTTCCAGC         | 10 | WNVUS1_10_LEFT_2 | AGACTCGAGCACCAAATGTGGG   | 10 |
| WNVUS1_11_LEFT   | CACAACKGAATGYGACTCGAAGAT    | 10 | WNVUS1_10_LEFT   | CCAGACTGGAGCATCAAATGTGG  | 10 |

|                   |                          |    |                  |                           |    |
|-------------------|--------------------------|----|------------------|---------------------------|----|
| WNVUS1_11_RIGHT   | ACGGTGTCCGACGCTCTCAC     | 10 | WNVUS1_10_RIGHT  | GAACYGCCCTYTCAAGCTTCC     | 10 |
| WNVUS1_11_RIGHT_2 | CACGGTGTCCGCAACTRTCAC    | 10 | WNVUS1_12_LEFT   | GAAGTYAAATCATGYACSTGGCC   | 10 |
| WNVUS1_13_LEFT_2  | GGCACGACGAAAAGACCCTCGTGC | 10 | WNVUS1_12_RIGHT  | CTTGCGAAGGACCTCCTGGG      | 10 |
| WNVUS1_13_LEFT    | GACATGATGAAAAGACCCTCGTGC | 10 | WNVUS1_14_LEFT_2 | GTCCTAGTGTGGGGGTATTACG    | 10 |
| WNVUS1_13_RIGHT_2 | CTCTTGGTTGGTCCACCTTGC    | 10 | WNVUS1_14_LEFT   | CCTGGTGTGGGGGCATTAC       | 10 |
| WNVUS1_13_RIGHT   | CTCCTGGTTGGTCCATCTCGC    | 10 | WNVUS1_14_RIGHT  | GCAGATGAGGCAAGCYCCTTTC    | 10 |
| WNVUS1_15_LEFT_2  | CAATGTGGTGGTGCCGCTGC     | 10 | WNVUS1_14_RIGHT  | CAAGCATARCAGACTTGCTCCTTC  | 10 |
| WNVUS1_15_LEFT    | CGACATCAAACGTGGTTGTTCCG  | 10 | WNVUS1_16_LEFT_2 | CTGCAGTTGGACTCATGTTTGC    | 10 |
| WNVUS1_15_RIGHT_2 | CYGCCTCTCAATCCACATGTC    | 10 | WNVUS1_16_LEFT   | GCTGTCGGCYTRATGTTTGCCA    | 10 |
| WNVUS1_15_RIGHT   | CGCCGTTCTCTCAATCCACATATC | 10 | WNVUS1_16_RIGHT  | GGTGATGGTGTGTCCCAAAGRAC   | 10 |
| WNVUS1_17_LEFT_2  | ATAAGTGCCTACACACCYTGGGC  | 10 | WNVUS1_16_RIGHT  | GAGGGAGTGTCCACARCAC       | 10 |
| WNVUS1_17_LEFT    | GGAARATATGGATGCTCAGAATGG | 10 | WNVUS1_18_LEFT_2 | CCACACACTATGGCACACCAC     | 10 |
| WNVUS1_17_RIGHT_2 | CCCCAATTTCTCCTTCTGGTGTC  | 10 | WNVUS1_18_LEFT   | GCAGGAGCRGGCGTGATG        | 10 |
| WNVUS1_17_RIGHT   | TTTGAACACCCCTGGTTTCGTC   | 10 | WNVUS1_18_RIGHT  | CTCARTCTTTTGTGATGGCCTC    | 10 |
| WNVUS1_19_LEFT_2  | CCATTGTGCAAGGAGAGAGAATGG | 10 | WNVUS1_18_RIGHT  | GCCACAGATCATCAAAGAGGCC    | 10 |
| WNVUS1_19_LEFT    | CGGATTCGAACCTGAGATGCTG   | 10 | WNVUS1_20_LEFT_2 | GATGTCTCCACACAGAGTCCC     | 10 |
| WNVUS1_19_RIGHT_2 | CGATGCTCGCTGGATCCGTG     | 10 | WNVUS1_20_LEFT   | GATGTCTCCTCACAGGGTGCC     | 10 |
| WNVUS1_19_RIGHT   | CATGAATATTGCCGCCGCTC     | 10 | WNVUS1_20_RIGHT  | GAAAGTCGTAYGAGACGGAGTAC   | 10 |
| WNVUS1_21_LEFT_2  | GGAAAGACCGTTTGGTTTGTTC   | 10 | WNVUS1_20_RIGHT  | GGGTACTCTGTCTCATAGGACTTTC | 10 |
| WNVUS1_21_LEFT    | GGGAAGACGGTTTGGTTTGTGC   | 10 | WNVUS1_22_LEFT_2 | GCTCAGCGGAGAGGACGC        | 10 |

|                   |                            |    |                   |                          |    |
|-------------------|----------------------------|----|-------------------|--------------------------|----|
| WNVUS1_21_RIGHT_2 | GAGTCGTCTTCATTCGTGTGCC     | 10 | WNVUS1_22_LEFT    | CGCCCAGAGACGTGGACG       | 10 |
| WNVUS1_21_RIGHT   | GTTGGAATCATCCTCATTGTGTGC   | 10 | WNVUS1_22_RIGHT_2 | CTTTCTCTACCCAACTTCGTG    | 10 |
| WNVUS1_23_LEFT    | CGGCTGGAGTGTACATACCACG     | 10 | WNVUS1_22_RIGHT   | GGCCTCAGAATCTTCCTTTACC   | 10 |
| WNVUS1_23_LEFT_2  | CAGCAGGAATATCATACCATGACC   | 10 | WNVUS1_24_LEFT_2  | GATCACAATCGGGCTCGTTGAG   | 10 |
| WNVUS1_23_RIGHT_2 | CTATTGTCTGAAGGGCGTCCGG     | 10 | WNVUS1_24_LEFT    | CGTTCTCAGATAGGGCTCATTGAG | 10 |
| WNVUS1_23_RIGHT   | GAATACTCCCATGGTCATCACACTC  | 10 | WNVUS1_24_RIGHT_2 | CAACTCCCAGRGTCTCTCTC     | 10 |
| WNVUS1_25_LEFT_2  | CAGGAACGAAAATAGCAGGCATGC   | 10 | WNVUS1_24_RIGHT   | CTCCTTGACCTCAATTCTTTGCC  | 10 |
| WNVUS1_25_LEFT    | GGAACGAAGATCGCCGGAATG      | 10 | WNVUS1_26_LEFT_2  | GTGGACGTTGGTGTGTCAGCTC   | 10 |
| WNVUS1_25_RIGHT_2 | GCTCCGCTTGCCAGCCTG         | 10 | WNVUS1_26_LEFT    | CTTCGTTCGATGTTGGAGTGTGCG | 10 |
| WNVUS1_25_RIGHT   | GCTGAGCGCATTGCCTCAGC       | 10 | WNVUS1_26_RIGHT_2 | GTTGCATTCCACTGAACTAGC    | 10 |
| WNVUS1_27_LEFT_2  | CAGTCATGCAGAAAAARGTTGGACAG | 10 | WNVUS1_26_RIGHT   | CCAAACAGAGCTTGCTCCATTCTC | 10 |
| WNVUS1_27_LEFT    | GATCTTGGTGTCTCTAGCTGCAG    | 10 | WNVUS1_28_LEFT_2  | GGGAAGTTTGAAGGAGAGACTC   | 10 |
| WNVUS1_27_RIGHT_2 | CGAGATCCACAACCTTTCCAC      | 10 | WNVUS1_28_LEFT    | GTACCGCAAAGAGGCCATCATC   | 10 |
| WNVUS1_27_RIGHT   | CATCCAAGGTCAATCACTTTTCCG   | 10 | WNVUS1_28_RIGHT_2 | CCAATGTCACAGAGCAGTGTGT   | 10 |
| WNVUS1_29_LEFT_2  | CTGGCCATGAAGAGCCACAAC      | 10 | WNVUS1_28_RIGHT   | GARGACTCTCCGATGTCACAAA   | 10 |
| WNVUS1_29_LEFT    | GTACAGGAAGTGAAAGGGTACACG   | 10 | WNVUS1_30_LEFT_2  | CCATGAGATGTACTGGGTGAGY   | 10 |
| WNVUS1_29_RIGHT_2 | GTTGACATCTTCTCAAACCTGGGG   | 10 | WNVUS1_30_LEFT    | GACTGGTCAGAAACCACTCTC    | 10 |
| WNVUS1_29_RIGHT   | GCCCTGGTTCCACTTCCAAG       | 10 | WNVUS1_30_RIGHT_2 | GAAGGGAGTAGTGTGTCAGTCATG | 10 |
| WNVUS1_31_LEFT_2  | GAATACAGCTCCACATGGCACC     | 10 | WNVUS1_30_RIGHT   | CACTCGTTGTTGACCGAAAGGA   | 10 |
| WNVUS1_31_LEFT    | GAGAACCACCCATATAGAACCTGG   | 10 | WNVUS1_32_LEFT_2  | GGAAGAACGCCCGGAAGC       | 10 |

|                   |                            |    |                     |                          |    |
|-------------------|----------------------------|----|---------------------|--------------------------|----|
| WNVUS1_31_RIGHT   | CTCTTTCCCATCATGTTGTARATGC  | 10 | WNVUS1_32_LEFT      | GAGGAGCGCCAGAGARGCAG     | 10 |
| WNVUS1_33_LEFT_2  | GGGTACATCTTGAAGGAAGTYGG    | 10 | WNVUS1_32_RIGHT_2   | CAGCAGTTCAAGAACCTTCGCTTC | 10 |
| WNVUS1_33_LEFT    | GTTACATCCTGCGTGAAGTTGGC    | 10 | WNVUS1_32_RIGHT_T   | CCAAGTCAGCTCTCGTGATGCG   | 10 |
| WNVUS1_33_RIGHT_T | CSCCATTCTCAAACAGCCAGG      | 10 | WNVUS1_34_LEFT_2    | GTGAAAGTGATGCGCCCGGC     | 10 |
| WNVUS1_35_LEFT_2  | GGTGGTATGACTGGCAGCAGG      | 10 | WNVUS1_34_LEFT      | GTCGTGAAAGTGATGAGGCCAG   | 10 |
| WNVUS1_35_LEFT    | GATGGTATGATTGGCAGCAGGTTC   | 10 | WNVUS1_34_RIGHT_T_2 | GAGAWATGCGAGCTCTGCCTAC   | 10 |
| WNVUS1_35_RIGHT_T | GTCTTCCATCCAYTCATTCTCCTC   | 10 | WNVUS1_34_RIGHT_T   | CGCACATTCCATCCAGCCCC     | 10 |
| WNVUS1_37_LEFT    | GAGAAGTATGYGGATTACATGAGYTC | 10 | WNVUS1_36_LEFT_2    | CGCAAAAGGAGAATGGATGACGAC | 10 |
| WNVUS1_37_RIGHT_T | GGTCTCCTCTAACCTCTAGTCC     | 10 | WNVUS1_36_LEFT      | CCATGCAGGAGGAGAGTGGATG   | 10 |
|                   |                            |    | WNVUS1_36_RIGHT_T   | CGTCTACTCAACTCCGGTGG     | 10 |
|                   |                            |    | WNVUS1_38_LEFT      | CCCTCAGAACCGTCTCGGAAG    | 10 |
|                   |                            |    | WNVUS1_38_RIGHT_T   | GCACTGTGCCGTGTGGCTG      | 10 |
